# Supplementary material
Source: Springer Nature journal article supplement (https://www.springermedizin.de/resource/supplementary/12885_2010_2136_MOESM8_ESM.pdf/9460602)
Supplement: MOESM8 [file 9460602]

Study  
ID

OR (95% CI)

1 anthracycline (a) v non-anthracycline (b)

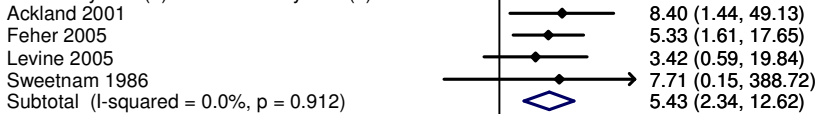

2 anthracycline (a) v mitoxantrone (b)

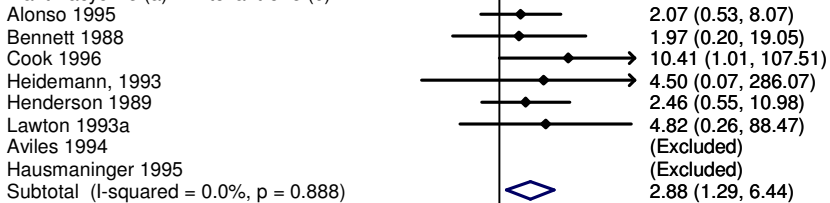

3 bolus (a) v continuous (b)

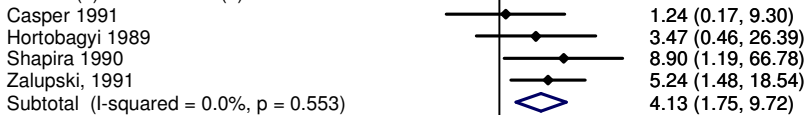

4 epirubicin (a) v doxorubicin (b)

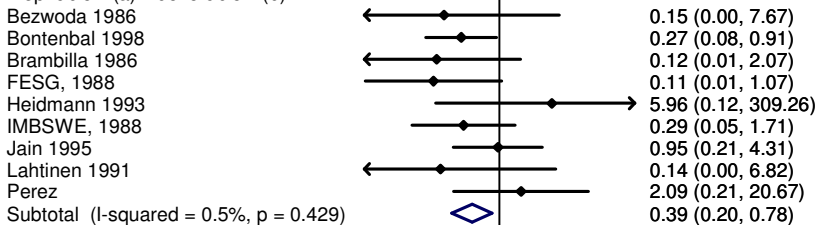

5 liposomal doxorubicin (a) v doxorubicin (b)

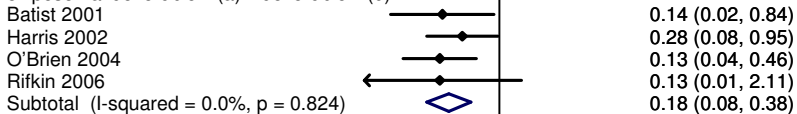

7 cardioprotective agent (a) v none (b)

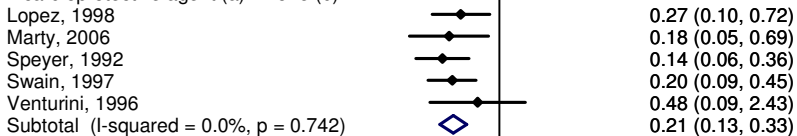

.01 .1 2 1 5 10 100

Favours a Favours b
